# Supplementary material for: The effects of surface charge on the intra-tumor penetration of drug delivery vehicles with tumor progression
Source: Royal Society of Chemistry journal article supplement (doi:10.1039/c8tb00038g), 2018-01-01
Supplement: c8tb00038g1.pdf [file c8tb00038g1.pdf]

## Supporting Information

### The effects of surface charge on intra-tumor penetration of drug delivery vehicles along with tumor progression

Donglin Han<sup>a</sup>, Hongzhao Qi<sup>a,c</sup>, Kai Huang<sup>b</sup>, Xueping Li<sup>a</sup>, Qi Zhan<sup>a</sup>, Jin Zhao<sup>a</sup>, Xin Hou<sup>a</sup>, Xianjin Yang<sup>a</sup>, Chunsheng Kang<sup>b,\*</sup>, Xubo Yuan<sup>a,\*</sup>

#### Supporting figures for results and discussion

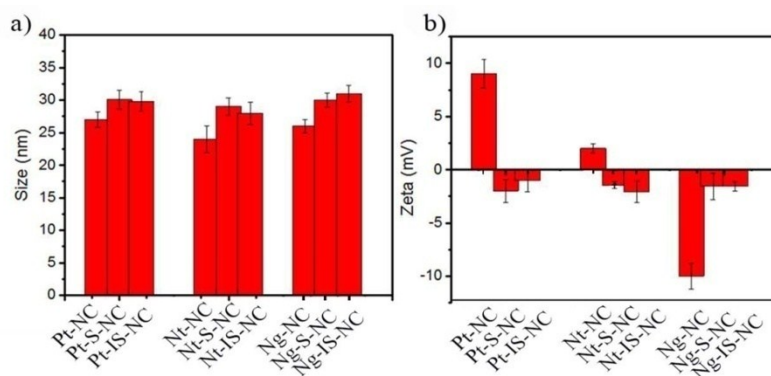

**Figure S1.** Characterization of pH-not-responsive nanocapsules. a) DLS measuring the size. b) the surface zeta potential.

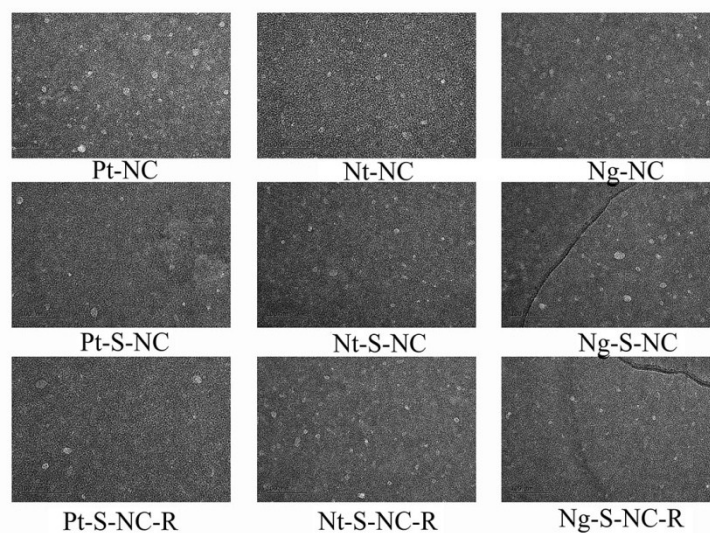

**Figure S2.** TEM showing the morphology of nanocapsules before and after modification of PGE

shell.

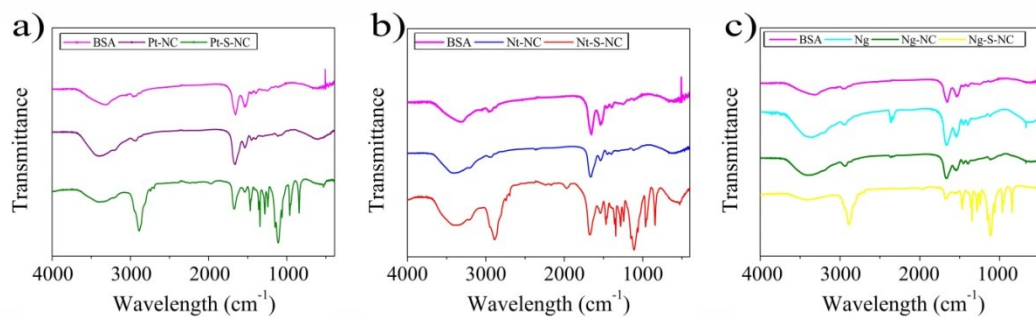

**Figure S3.** The infrared spectra of nanocapsules. a) nanocapsules with positive surface charge. b) nanocapsules with neutral surface charge. c) nanocapsules with negative surface charge.

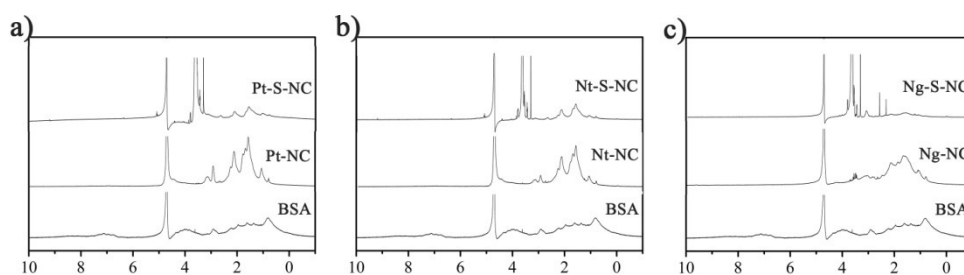

**Figure S4.** The  $^1\text{H}$  NMR spectra of nanocapsules in  $\text{D}_2\text{O}$ . a) nanocapsules with positive surface charge. b) nanocapsules with neutral surface charge. c) nanocapsules with negative surface charge.

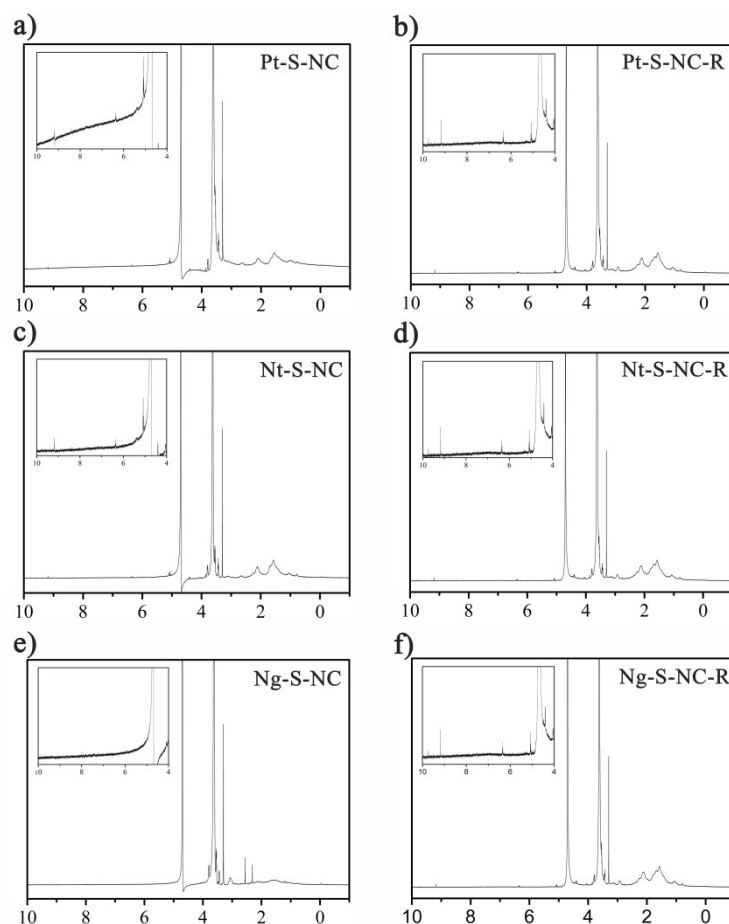

**Figure S5.** The  $^1\text{H}$  NMR spectra of nanocapsules in  $\text{D}_2\text{O}$ . a,b) nanocapsules with positive surface charge. c,d) nanocapsules with neutral surface charge. e,f) nanocapsules with negative surface charge.

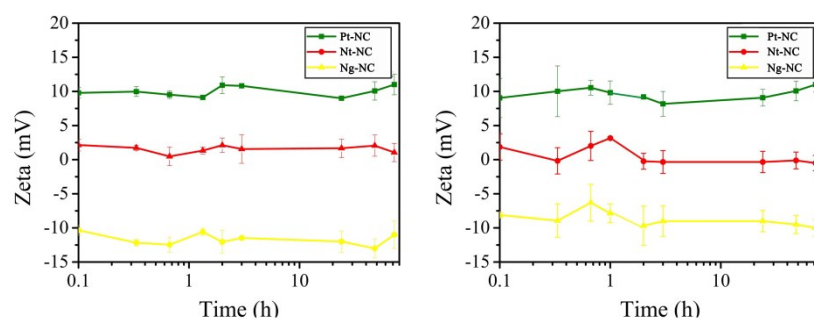

**Figure S6.** In vitro stability of nanocapsules with different surface charge in PB. a) pH=6.8.  
b) pH=7.4.

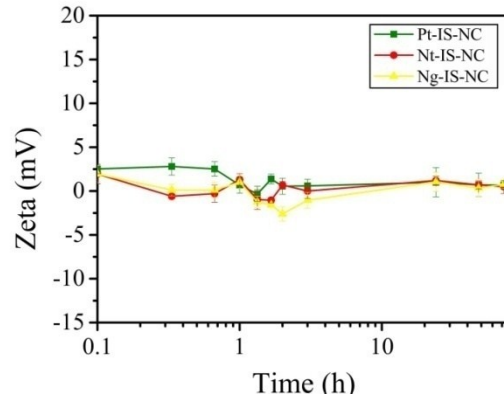

**Figure S7.** In vitro stability of pH-not-responsive nanocapsules in PB (pH=6,8).

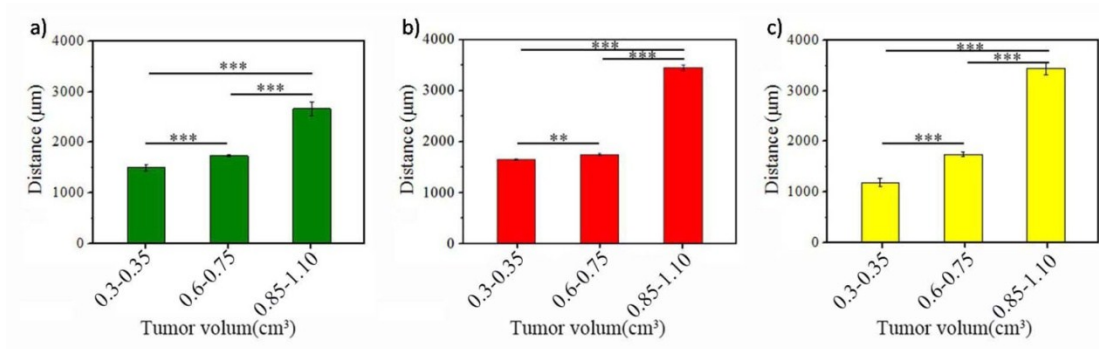

**Figure S8.** The penetrating ability of nanoparticles with the same surface zeta potential in tumors of different sizes. a) Pt-S-NC. b) Nt-S-NC. c) Ng-S-NC, (n=3, \*p<0.05, \*\*P<0.01, \*\*\*P,0.005).

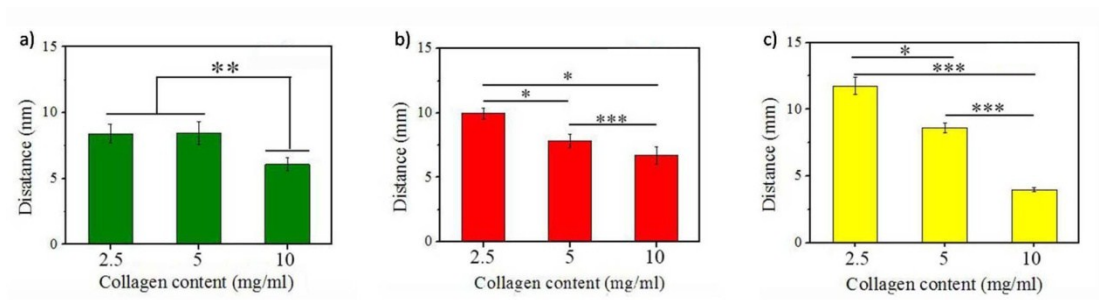

**Figure S9.** The penetration distance of nanocapsules in collagen hydrogel of different concentration. a) Pt-S-NC. b) Nt-S-NC. c) Ng-S-NC, (n=3, \*p<0.05, \*\*P<0.01, \*\*\*P<0.005).
